# Supplementary material for: NanoLC MALDI MS/MS based quantitative metabolomics reveals the alteration of membrane biogenesis in oral cancer
Source: Royal Society of Chemistry journal article supplement (doi:10.1039/c6ra07001a), 2016-01-01
Supplement: c6ra07001a1.pdf [file c6ra07001a1.pdf]

### Supplementary figures

Figure S1

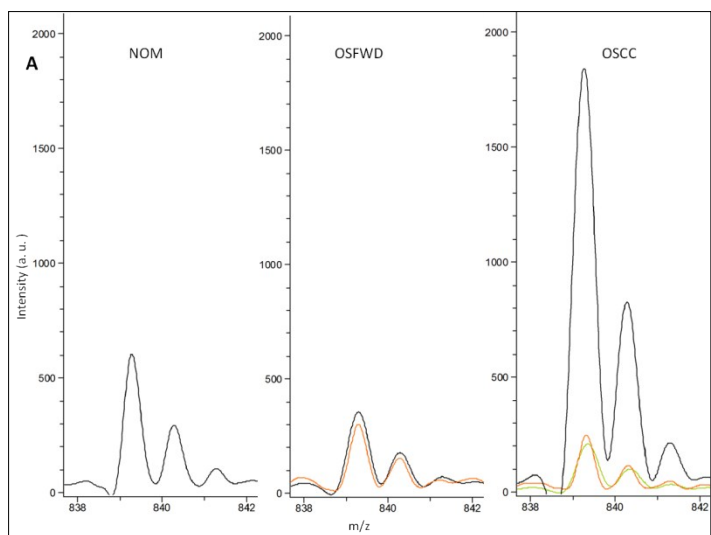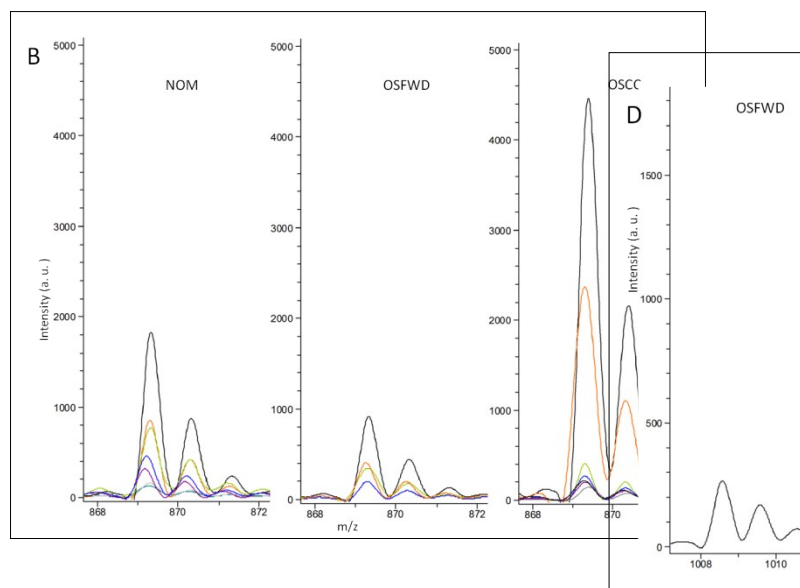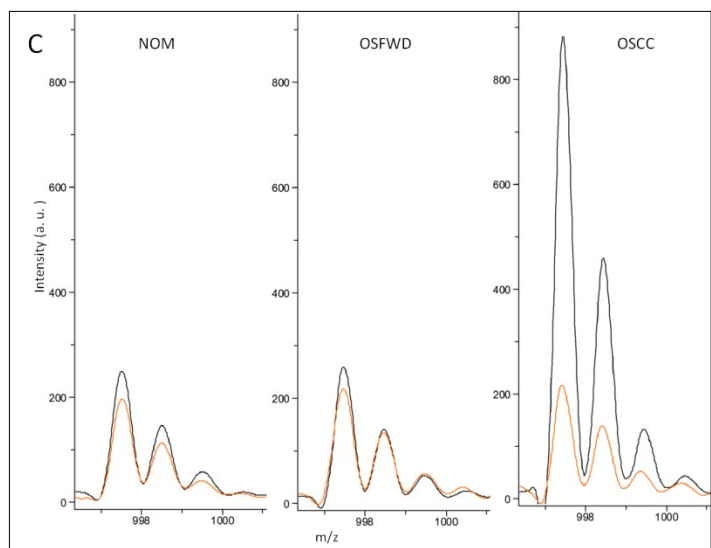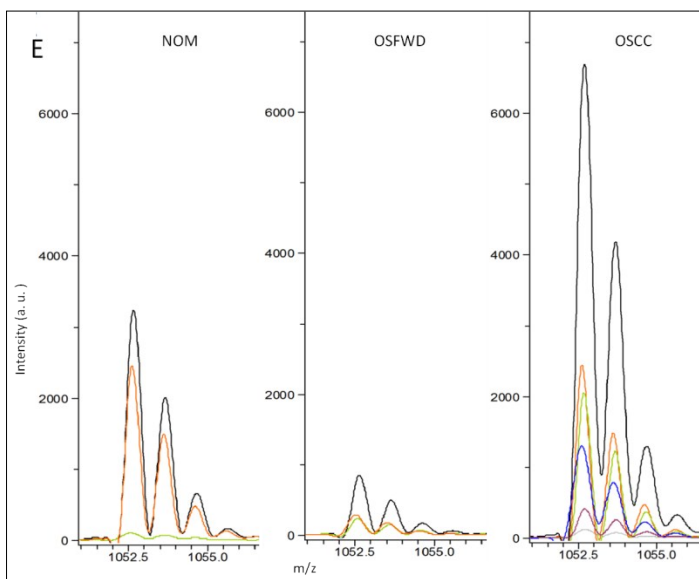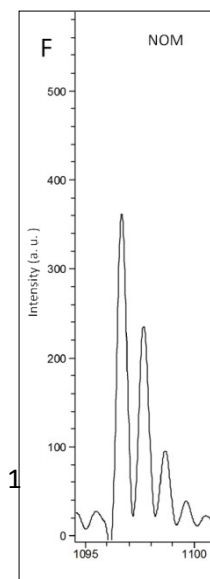

**Figure S1** Overlapped MS spectra of PI (A), TG (B), PIP2 (C), CDP-DAG (D), Timnodonyl CoA (E), 3-Oxo-docosa-7,10,13,16-all-cis-tetraenoyl-CoA (F) with isotopic distributions obtained from eluted fraction spots showing variation of AUCs in three conditions: normal (NOM), pre-cancer (OSF) and cancer (OSCC).

**Figure S2**

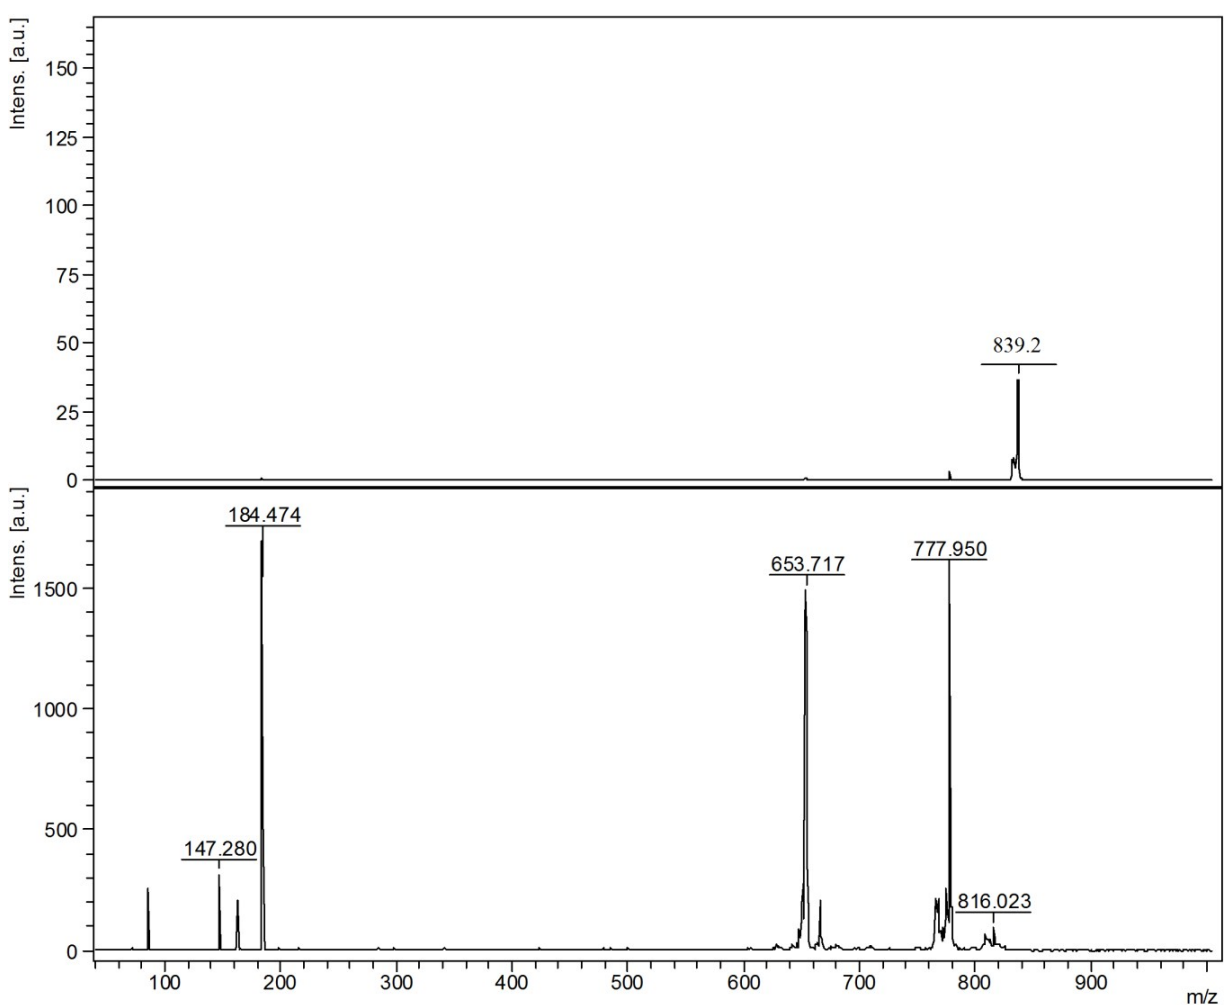

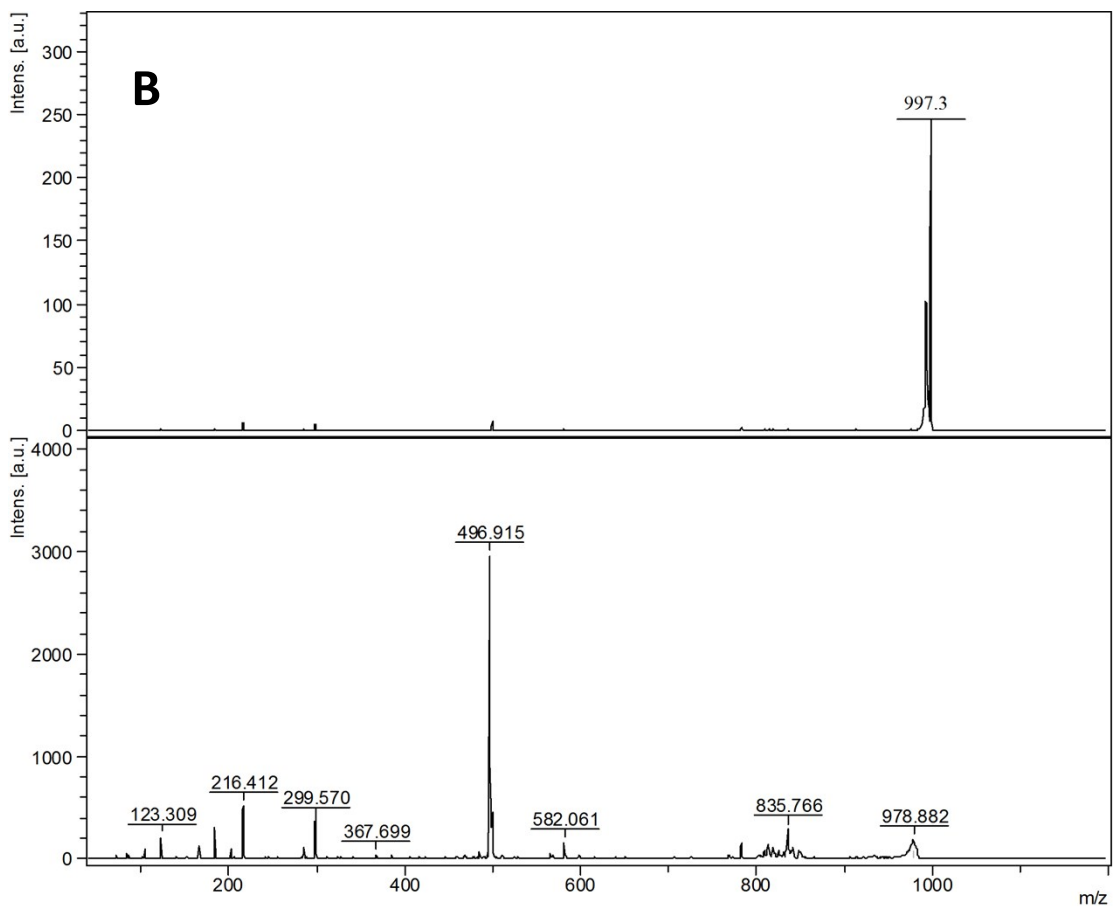

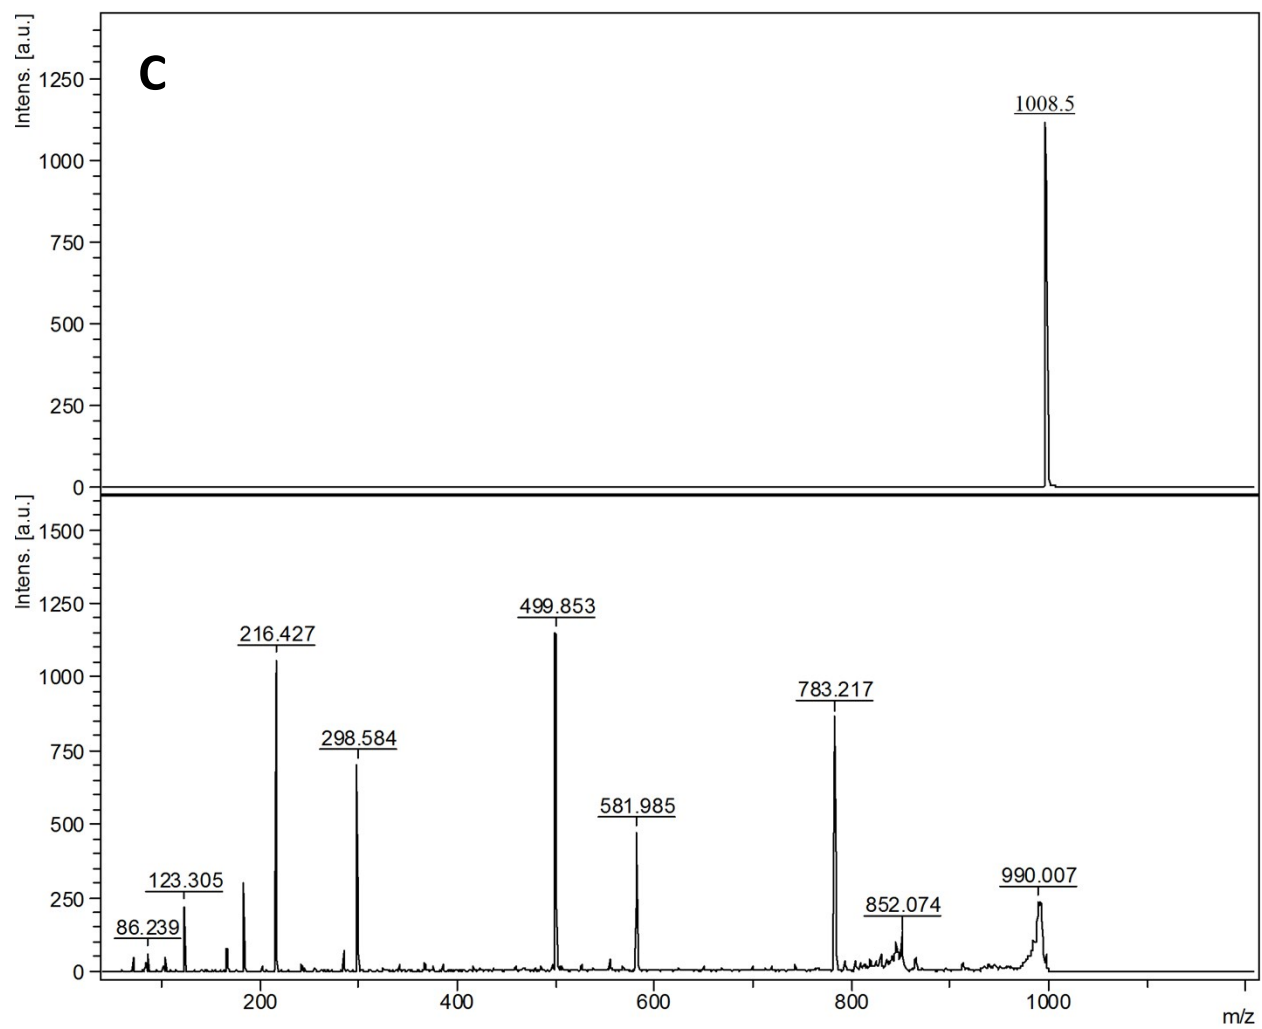

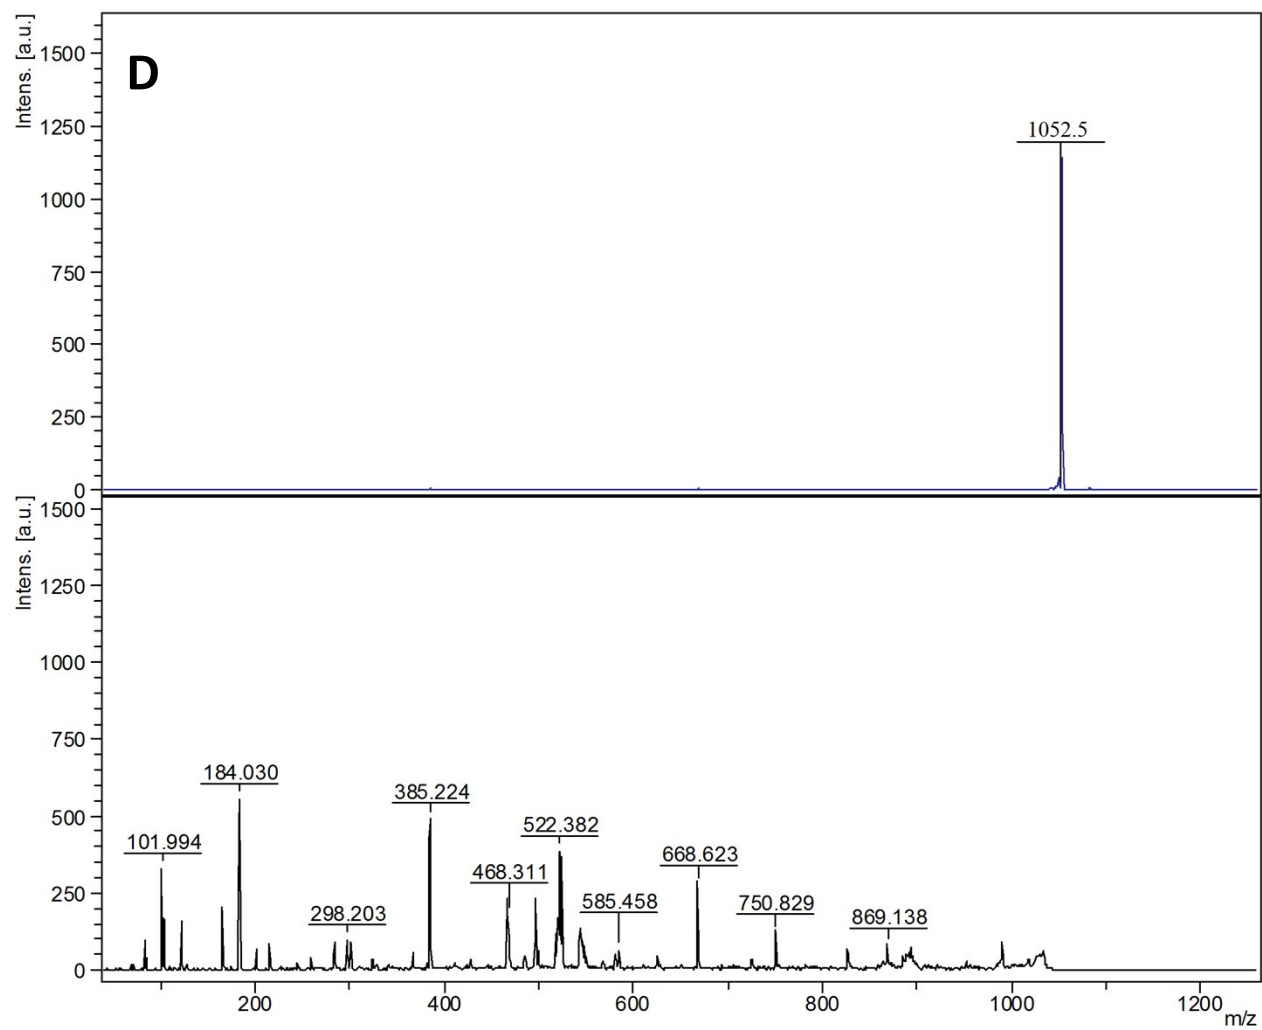

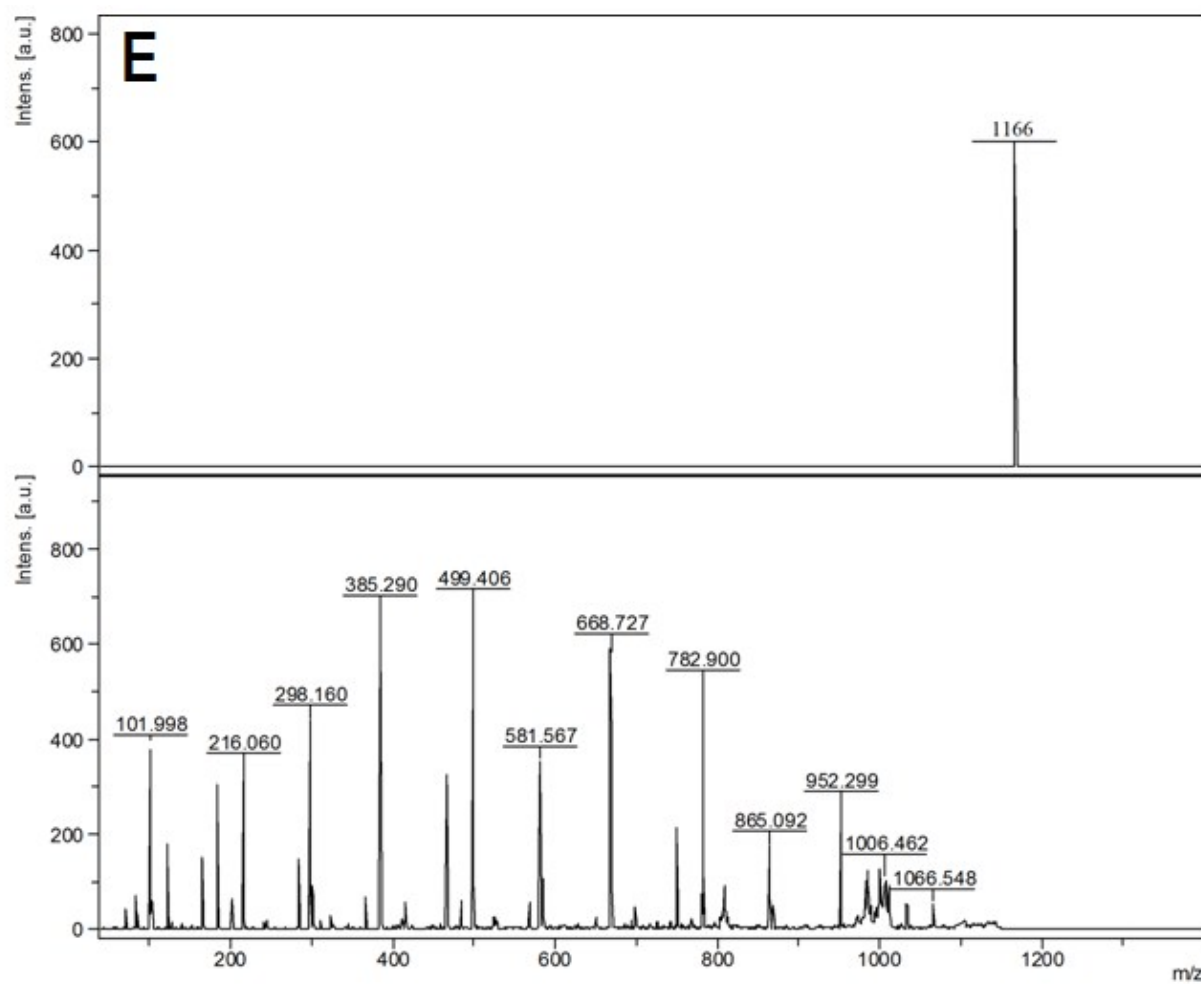

**Figure S2** MS/MS fragmentation (lower panel) of separated metabolites along with their parent peaks (upper panel) such as PI (A), PIP2 (B), CDP-DAG (C), Timnodonyl CoA (D), Ganglioside (E).
